# Supplementary material for: Autophagy controls mucus secretion from intestinal goblet cells by alleviating ER stress
Source: PubMed Central journal article supplement — Cell Host Microbe. 2023 Mar 8;31(3):433–446.e4. doi: 10.1016/j.chom.2023.01.006 (PMC10016318; doi:10.1016/j.chom.2023.01.006), 2023-03-08
Supplement: mmc1.pdf [file mmc1.pdf]

**Cell Host & Microbe, Volume 31**

**Supplemental information**

**Autophagy controls mucus secretion from intestinal  
goblet cells by alleviating ER stress**

**Maria Naama, Shahar Telpaz, Aya Awad, Shira Ben-Simon, Sarina Harshuk-Shabso, Sonia Modilevsky, Elad Rubin, Jasmin Sawaed, Lilach Zelik, Mor Zigdon, Nofar Asulin, Sondra Turjeman, Michal Werbner, Supapit Wongkuna, Rachel Feeney, Bjoern O. Schroeder, Abraham Nyska, Meital Nuriel-Ohayon, and Shai Bel**

Supplementary Information

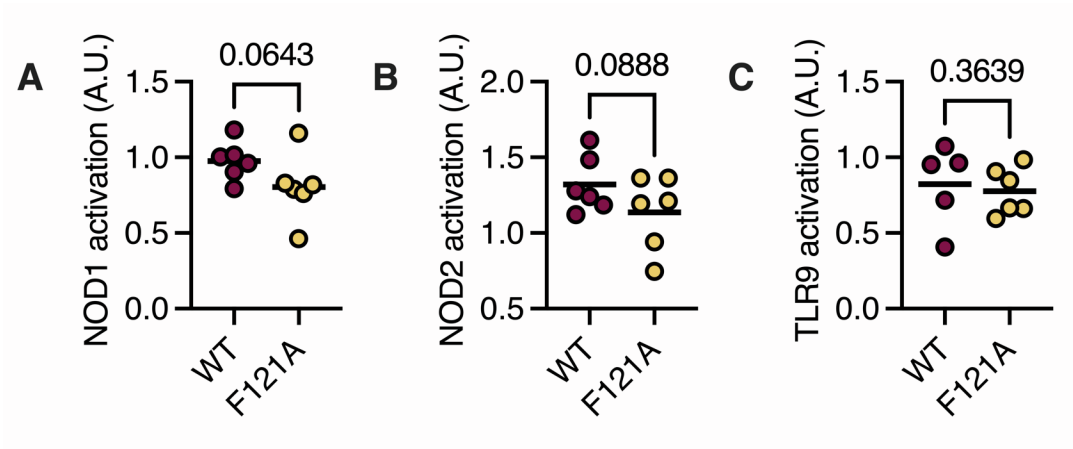

**Figure S1. Reduced translocation of luminal antigens into the bloodstream of *Becn1*<sup>F121A</sup> mice, Related to Figure 1.** (A) Detection of NOD1, (B) NOD2 and (C) TLR9 agonist in mouse serum using reporter cell lines. Student's *t* test; *P* values are displayed. WT, wild type; F121A, *Becn1*<sup>F121A</sup>; A.U., arbitrary units.

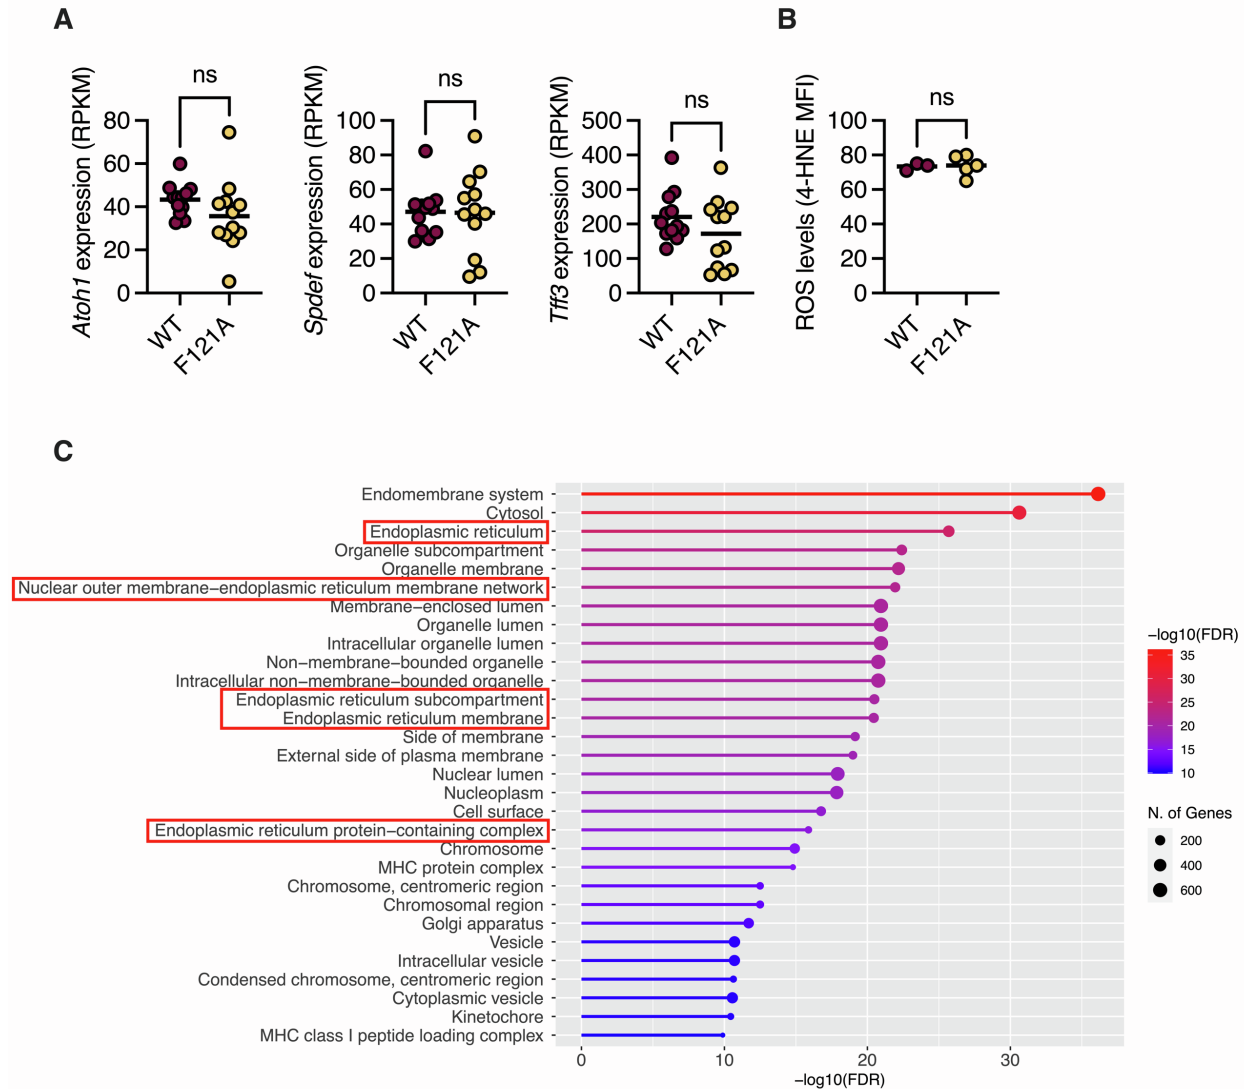

**Figure S2. Transcripts of ER proteins are altered in *Becn1*<sup>F121A</sup> mice, Related to Figure 2.**

(A) Expression levels of goblet cell-specific transcription factors in colons of mice using RNA sequencing. (B) Levels of the ROS-indicator 4 hydroxynonenal specifically in colonic goblet cell using immunohistochemistry. (C) Pathway analysis of differently expressed genes between wild type and *Becn1*<sup>F121A</sup> mice using GO cellular components analysis. ER-related compartments are marked in red. (A and B) Each dot represents a mouse. Student's *t* test. ns, not significant; 4-HNE, 4 hydroxynonenal; RPKM, Reads per kilobase of transcript; WT, wild type; F121A, *Becn1*<sup>F121A</sup>.

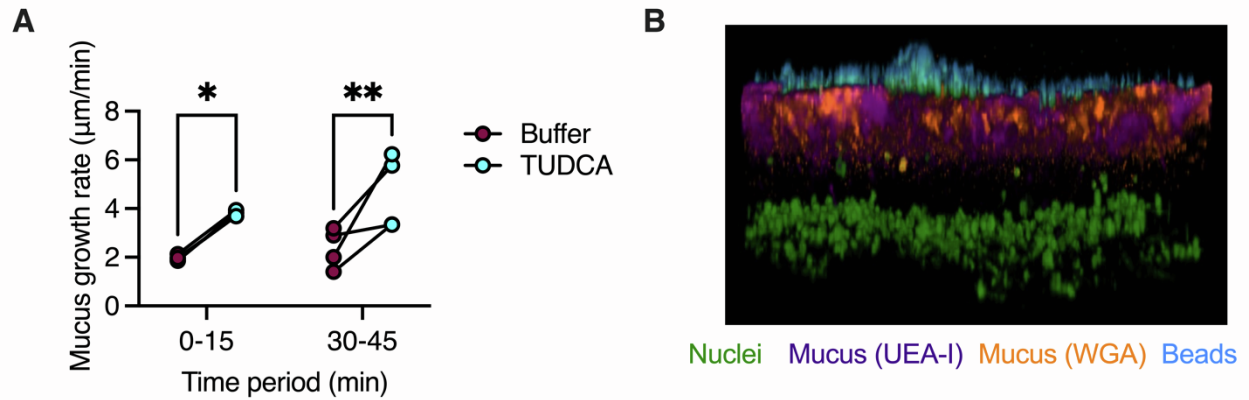

**Figure S3. Reducing ER stress increases mucus secretion rate in a sustainable manner, Related to Figure 3.** (A) Mucus secretion rates measured in colonic explants treated as noted. Each dot represents a mouse. \* $P < 0.05$ ; \*\* $P < 0.01$ ; ns, not statistically significant. Two-way ANOVA. TUDCA, tauroursodeoxycholic acid. (B) Confocal Z-stack imaging of mucus penetrability in TUDCA treated colon explants. DNA is in green, UEA-1 lectin in purple, WGA lectin in orange and beads in cyan.

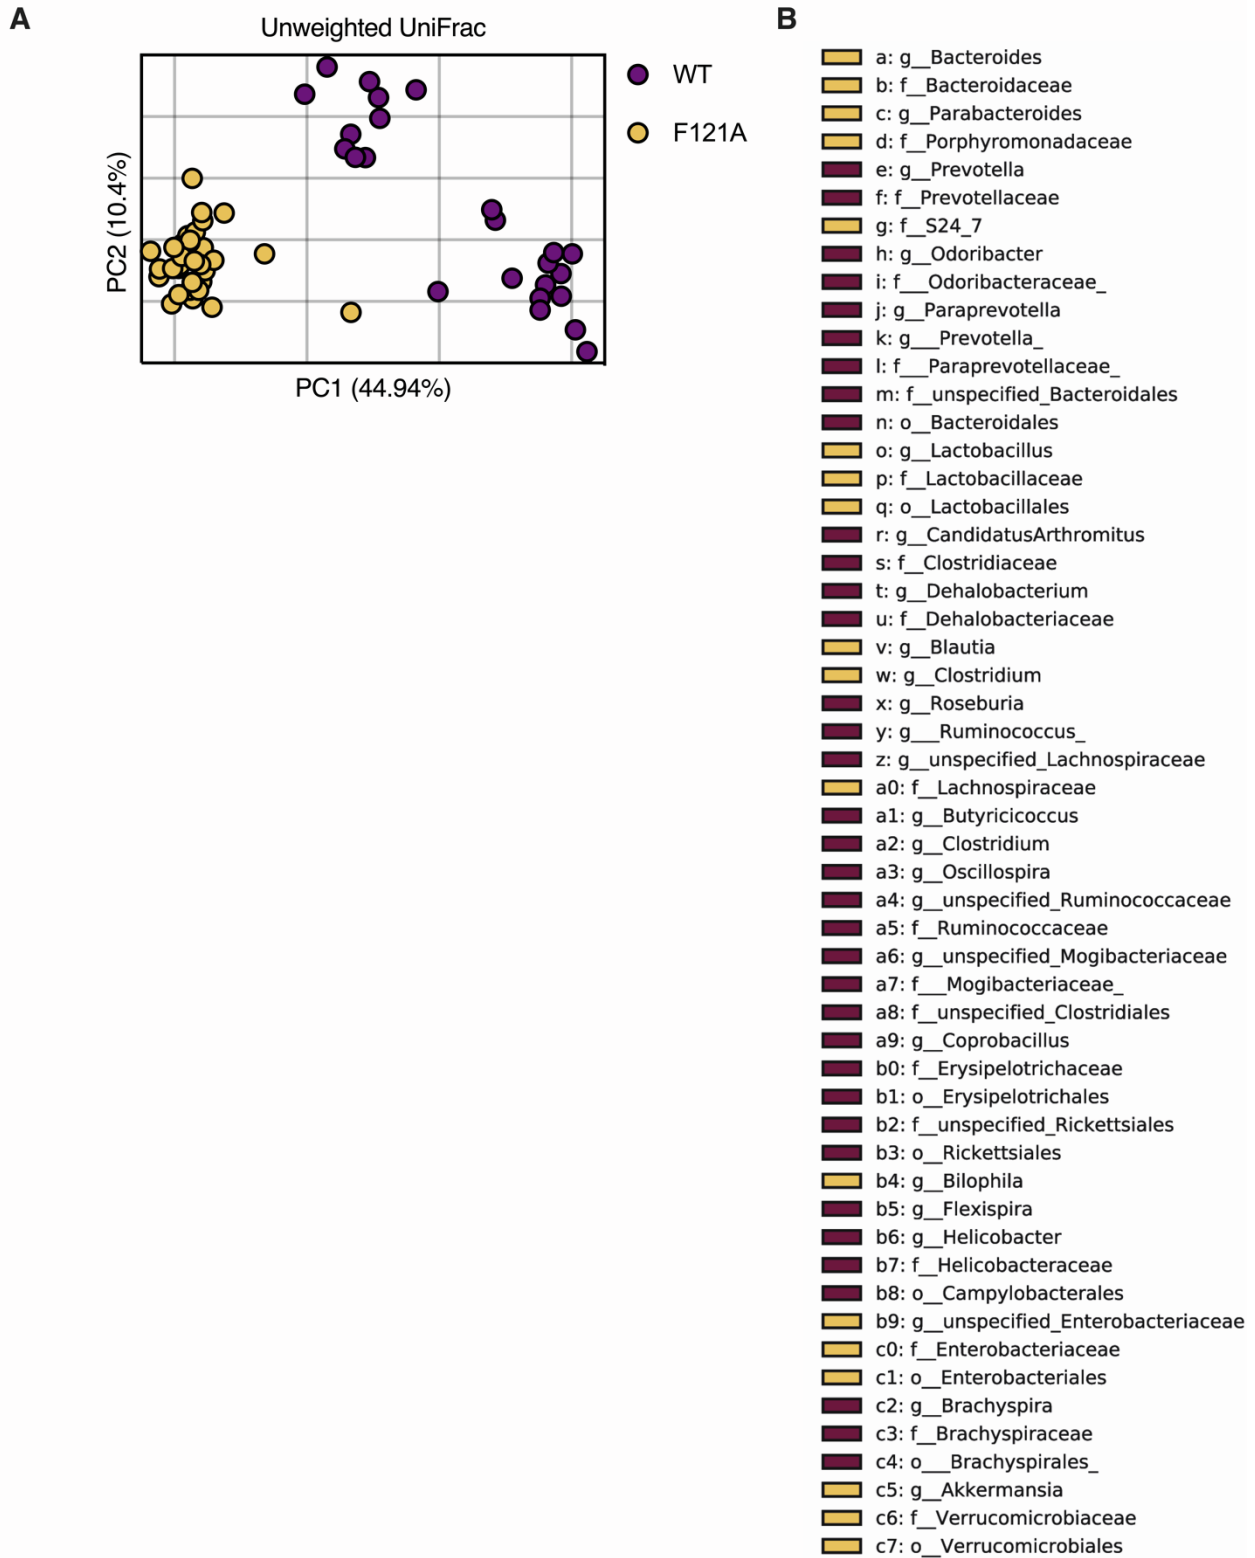

**Figure S4.** The gut microbiota of *Becn1*<sup>F121A</sup> mice is different than that of wild type mice and enriched with mucus-utilizing bacteria, Related to Figure 5. 16 S rRNA sequencing was performed to characterize gut microbiota composition. (A) PCoA of fecal microbiota  $\beta$  diversity

based on unweighted UniFrac. Each dot represents a mouse. (B) Legend of cladogram depicting LefSe analysis of differently abundant bacteria in wild type and *Becn1*<sup>F121A</sup> mice in Figure 5E.

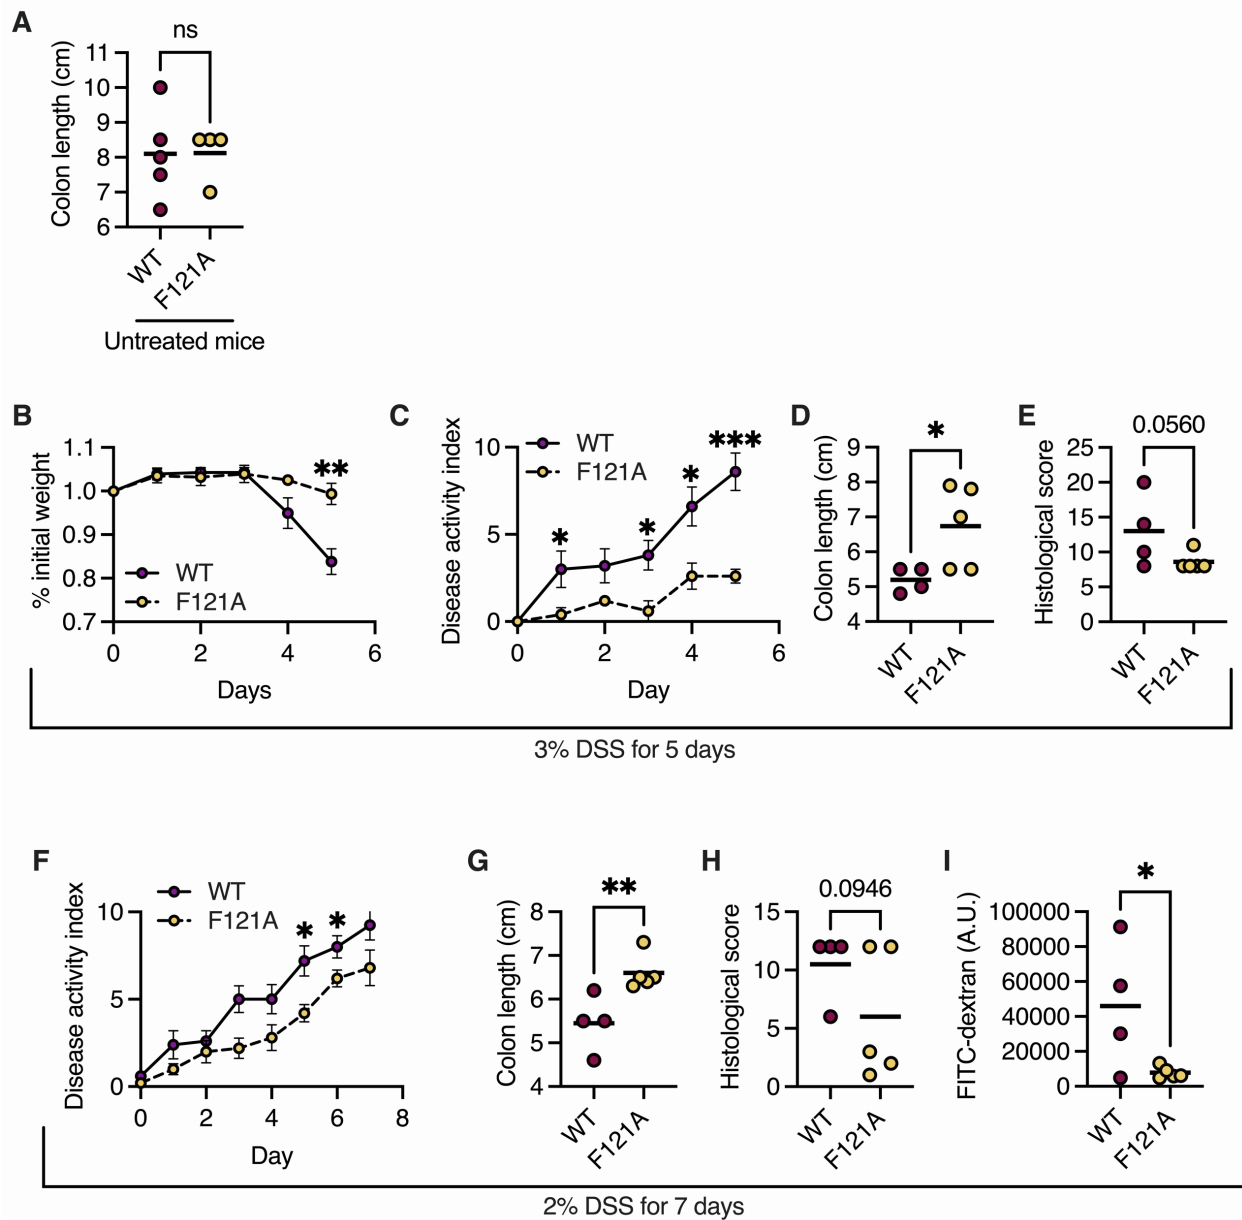

**Figure S5. *Becn1*<sup>F121A</sup> mice are protected from colitis, Related to Figure 6.** (A) Colon length of naïve wild type and *Becn1*<sup>F121A</sup> mice. (B-E) Relative weight change  $\pm$ SEM (B), disease activity index  $\pm$ SEM (C), colon length (D) and histological damage score (E) of mice treated with 3% DSS for 5 days. (F-I) Disease activity index  $\pm$ SEM (F), colon length (G), histological damage score (H) and FITC-dextran in serum (I) of mice treated with 2% DSS for 7 days. (A, C-E, and G-I) Each symbol represents a mouse. \* $P < 0.05$ ; \*\* $P < 0.01$ ; \*\*\* $P < 0.001$ ; (A, C-E and G-I) Student's *t* test; (B, C and F) Multiple unpaired *t* tests corrected for false discovery rate. WT, wild type; F121A, *Becn1*<sup>F121A</sup>; A.U., arbitrary units.
